# Supplementary material for: A simple, efficient route to modify the properties of epoxy dynamic polymer networks
Source: Royal Society of Chemistry journal article supplement (doi:10.1039/d1sm01402a), 2021-12-07
Supplement: d1sm01402a1.pdf [file d1sm01402a1.pdf]

## Supporting Information

### A simple, efficient route to modify properties of epoxy dynamic polymer networks

Shizhen Zhao<sup>a</sup>, Hongkun Yang<sup>a</sup>, Dong Wang<sup>\*,a</sup>, and Thomas P. Russell<sup>\*,b,c</sup>

- a. Beijing Advanced Innovation Center for Soft Matter Science and Engineering & State Key Laboratory of Organic-Inorganic Composites, Beijing University of Chemical Technology, Beijing 100029, China
- b. Polymer Science and Engineering Department, University of Massachusetts Amherst, Massachusetts 01003, United States
- c. Materials Sciences Division, Lawrence Berkeley National Laboratory, 1 Cyclotron Road, Berkeley, California 94720, United States

#### Corresponding Author

\*E-mail: [dwang@mail.buct.edu.cn](mailto:dwang@mail.buct.edu.cn)

\*E-mail: [russell@mail.pse.umass.edu](mailto:russell@mail.pse.umass.edu)

**Table S1** The compositions of epoxy DPNs and epoxy-ESO DPNs.

| Samples       | DGEBA(g) | AA(g) | ESO(g) | DA(g) | TBD(sum, g) <sup>a</sup> |
|---------------|----------|-------|--------|-------|--------------------------|
| Epoxy DPNs    | 3.404    | 1.461 | 0      | 0     | 0.139                    |
| Epoxy-ESO-5   | 3.404    | 1.461 | 0.170  | 0.083 | 0.144                    |
| Epoxy-ESO-7.5 | 3.404    | 1.461 | 0.255  | 0.125 | 0.146                    |
| Epoxy-ESO-10  | 3.404    | 1.461 | 0.340  | 0.166 | 0.149                    |

<sup>a</sup> This mass is the sum of the addition amount of TBD in the epoxy (DGEBA) mixture and ESO mixture.

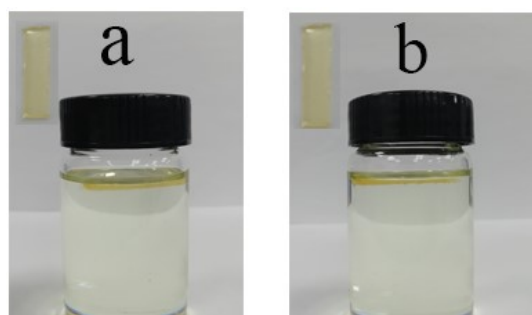

**Fig. S1** Photos of epoxy-ESO-7.5 DPNs (a) before swelling and (b) after swelling in 1,2,4-trichlorobenzene at 50 °C for 48 h.

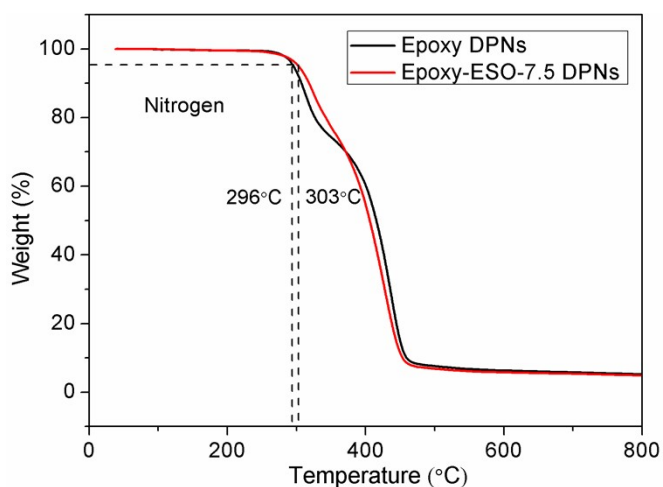

**Fig. S2** TGA curves in a nitrogen atmosphere of pure epoxy DPNs and epoxy-ESO-7.5 DPNs.

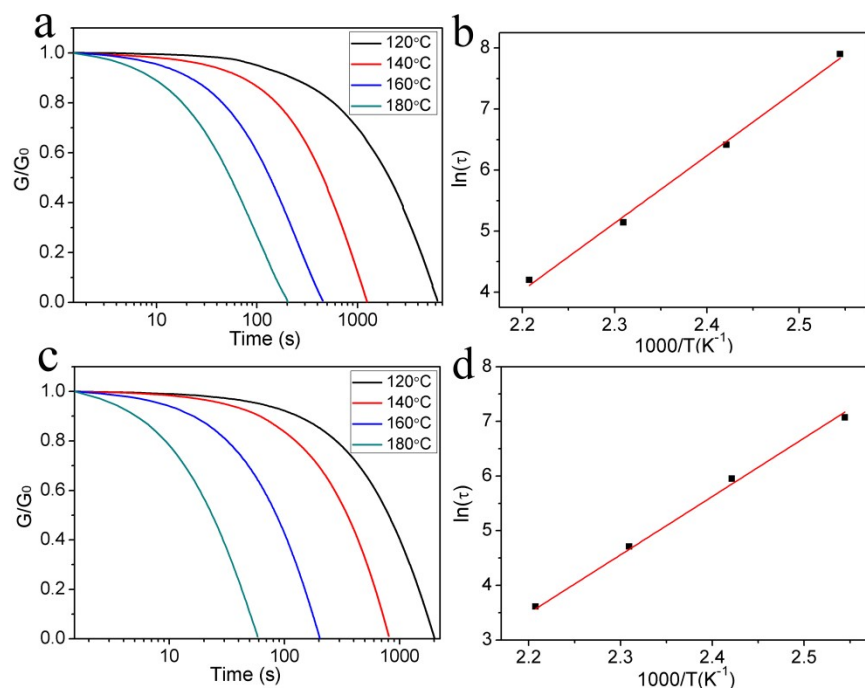

**Fig. S3** Normalized stress–relaxation curves of (a) epoxy-ESO-5 DPNs and (c) epoxy-ESO-10 DPNs at different temperatures. The fitting of the relaxation times to the Arrhenius equation of (b) epoxy-ESO-5 DPNs and (d) epoxy-ESO-10 DPNs.

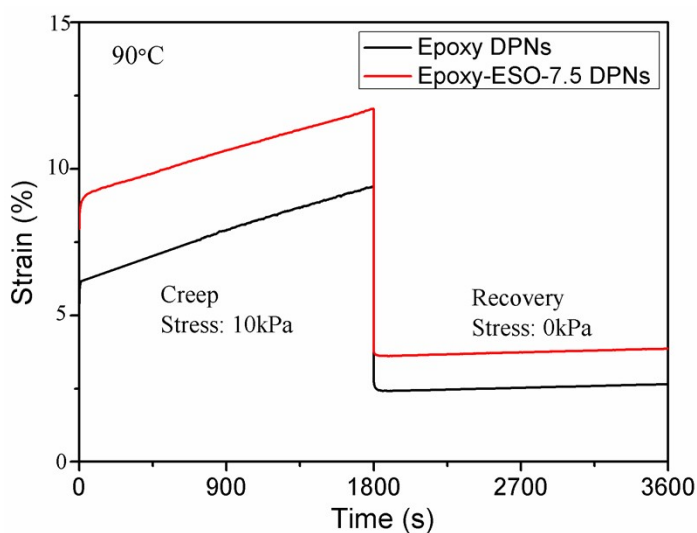

**Fig. S4** Creep-recovery behavior of pure epoxy DPNs and epoxy-ESO-7.5 DPNs.

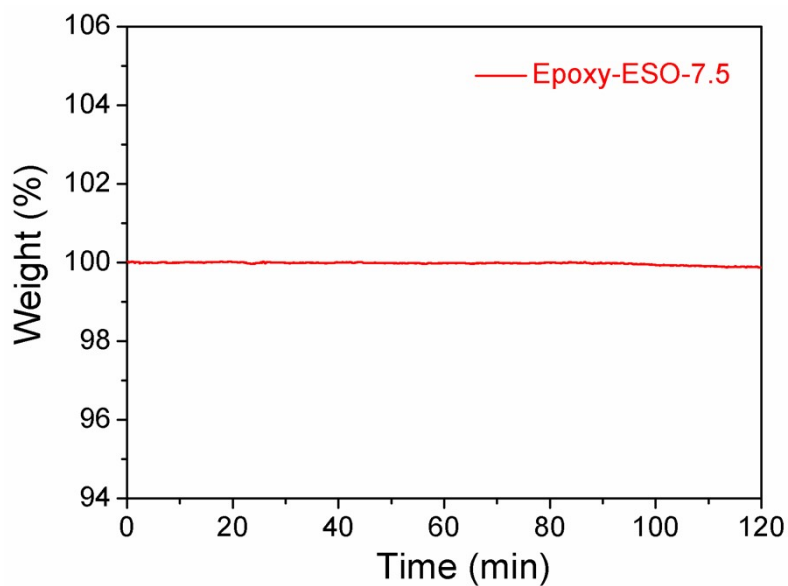

**Fig. S5** TGA curve of the epoxy-ESO-7.5 DPNs at 130 °C for 120 min.

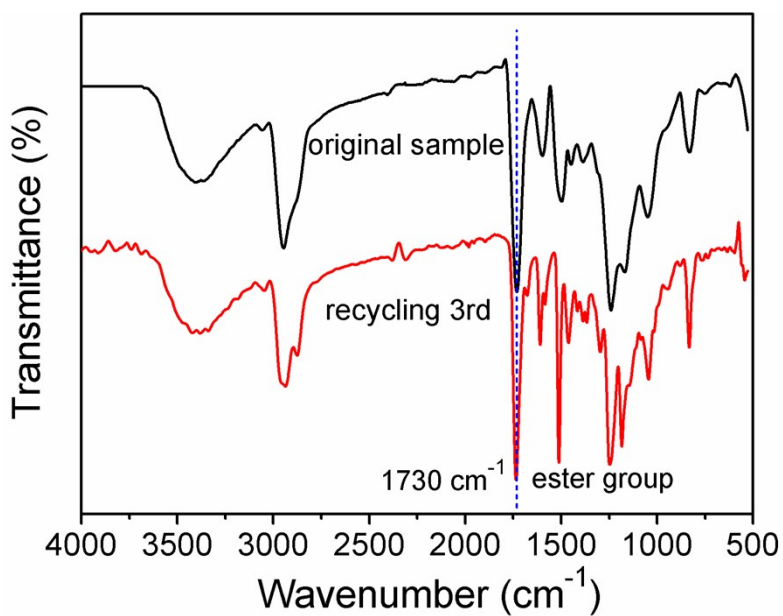

**Fig. S6** FTIR spectra of original and recycled epoxy-ESO-7.5 DPNs after three reprocessing cycles.

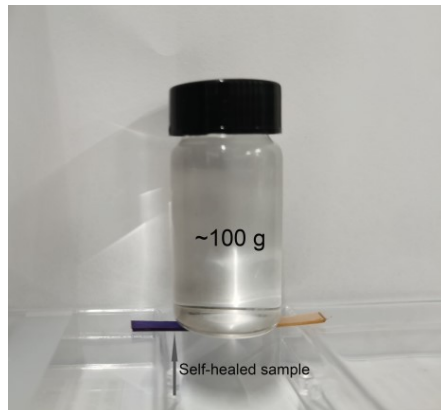

**Fig. S7** The photo of epoxy-ESO-7.5 sample that can withstand a weight of 100 g after self-healing.
